# Supplementary material for: Reference Intervals and Percentiles for Hematologic and Serum Biochemical Values in Captive Bred Rhesus (Macaca mulatta) and Cynomolgus Macaques (Macaca fascicularis)
Source: MDPI journal article supplement (doi:10.3390/ani13030445), 2023-01-28
Supplement: s1 [file s1]

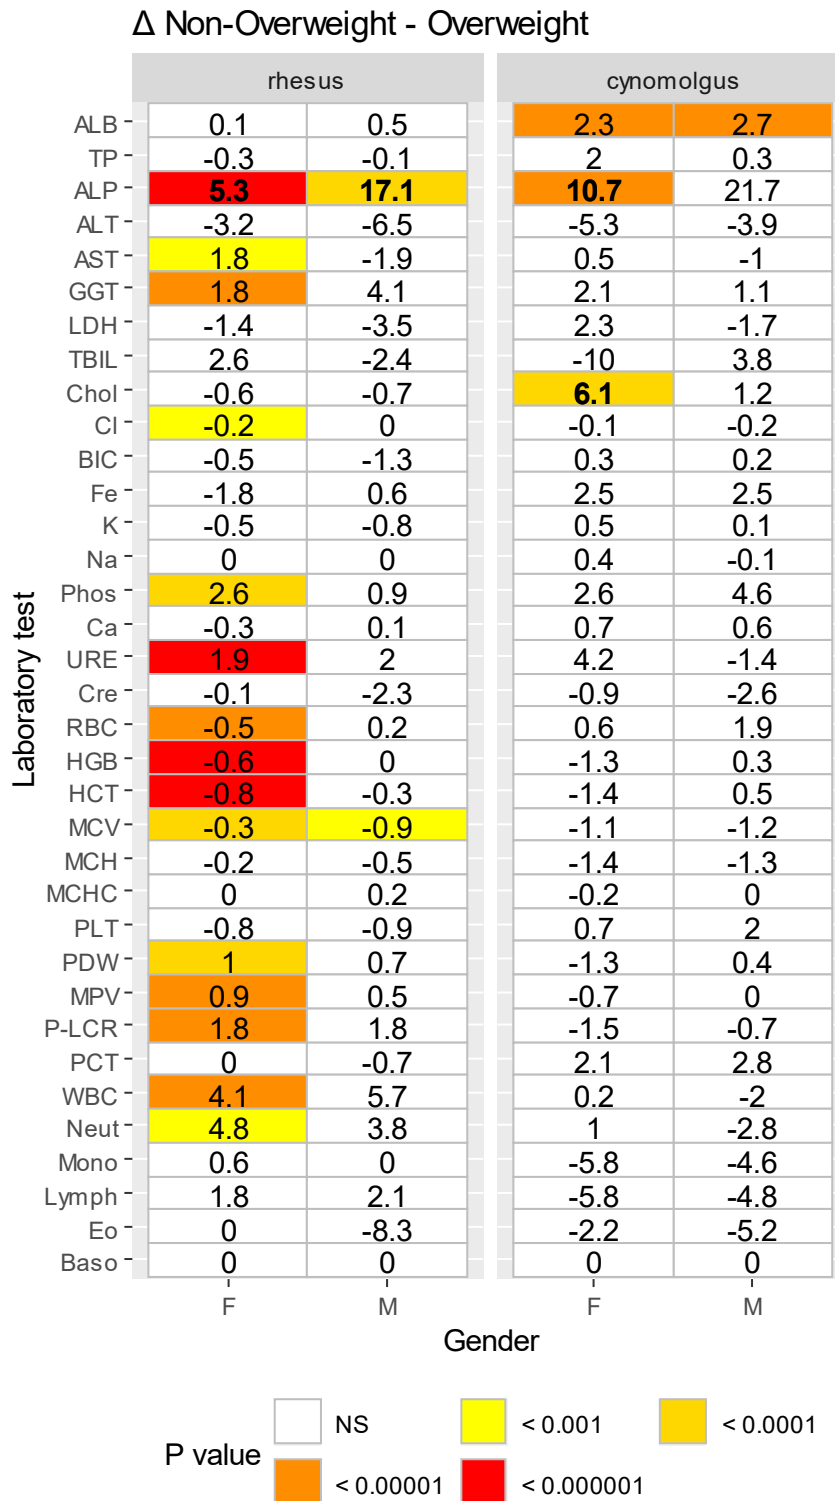

Figure S7A. Comparisons between normal and overweight adult rhesus and cynomolgus, numbers indicate percentual differences (Delta) between Normal – Obese, Delta values greater than 5% are in bold.

|                 |       | rhesus                              |      | cynomolgus |     |
|-----------------|-------|-------------------------------------|------|------------|-----|
| Glucose by Year | 18-19 | 0                                   | 1.6  | -1.7       | -1  |
|                 | 20-21 | -1                                  | -3.7 | -11        | 0.6 |
|                 |       | F                                   | M    | F          | M   |
|                 |       | Gender                              |      |            |     |
|                 |       | P value <input type="checkbox"/> NS |      |            |     |

Figure S7B. Glucose comparison between 2018-2019 and 2020-201 for normal and overweight adult rhesus and cynomolgus, numbers indicate percentual differences (Delta) between Normal – Obese, Delta values greater than 5% are in bold.
