# Supplementary material for: Reference Intervals and Percentiles for Hematologic and Serum Biochemical Values in Captive Bred Rhesus (Macaca mulatta) and Cynomolgus Macaques (Macaca fascicularis)
Source: MDPI journal article supplement (doi:10.3390/ani13030445), 2023-01-28
Supplement: s1 [file s1]

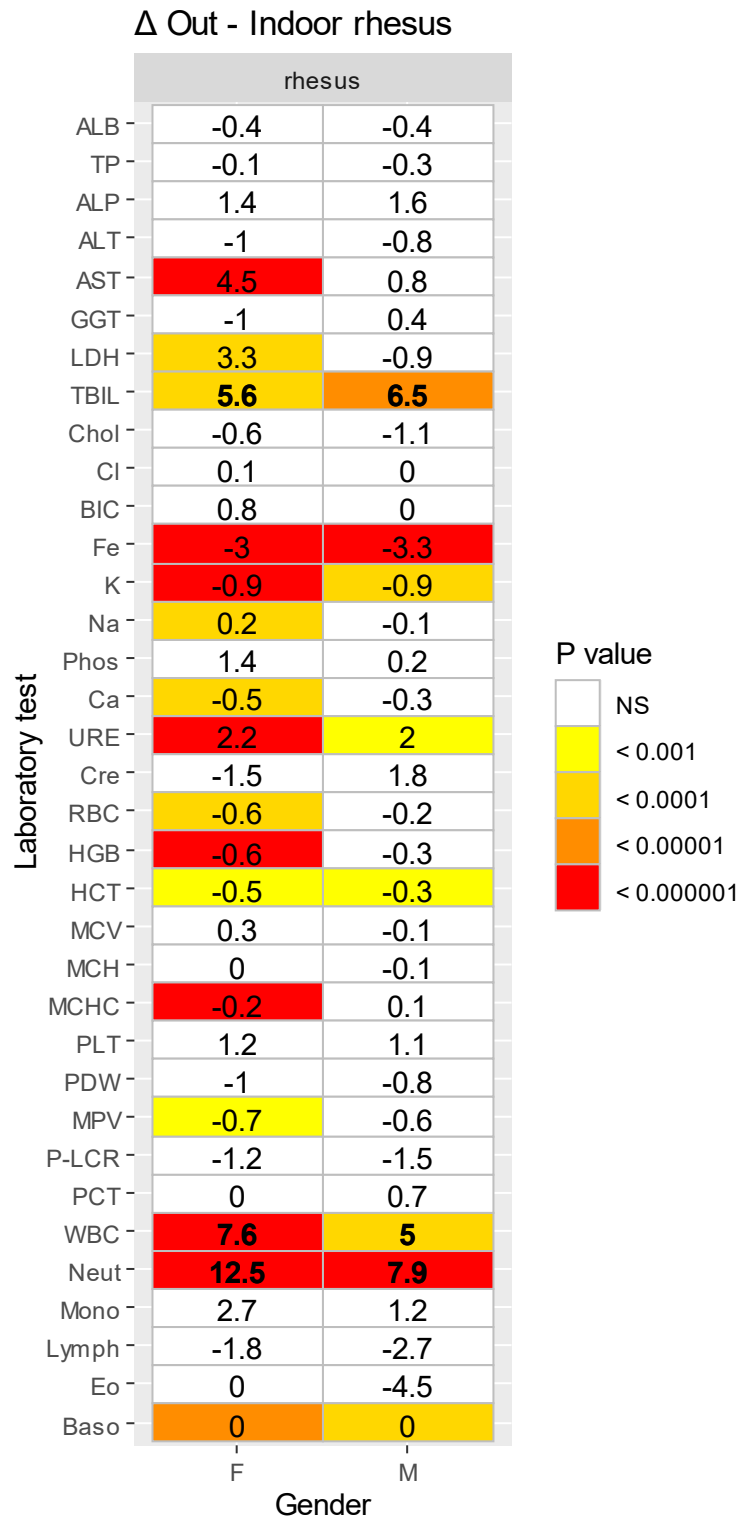

Figure S5A. Comparisons between adult rhesus macaques with or without outdoor access, numbers indicate percentual differences (Delta) between Outdoor – Indoor, Delta values greater than 5% are in bold.

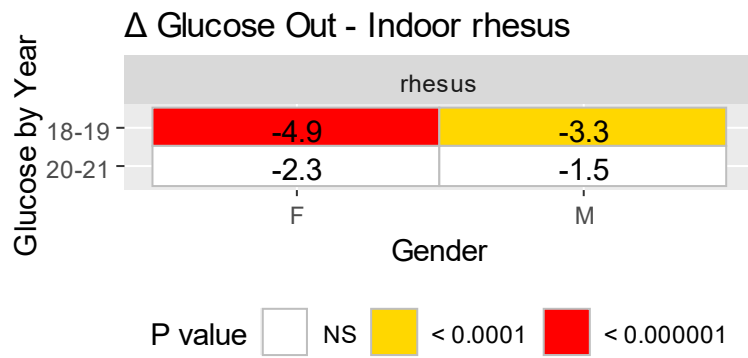

Figure S5B. Glucose comparison between 2018-2019 and 2020-201 in adult rhesus macaques with or without outdoor access, numbers indicate percentual differences (Delta) between Outdoor – Indoor, Delta values greater than 5% are in bold.
