# Supplementary material for: Reference Intervals and Percentiles for Hematologic and Serum Biochemical Values in Captive Bred Rhesus (Macaca mulatta) and Cynomolgus Macaques (Macaca fascicularis)
Source: MDPI journal article supplement (doi:10.3390/ani13030445), 2023-01-28
Supplement: s1 [file s1]

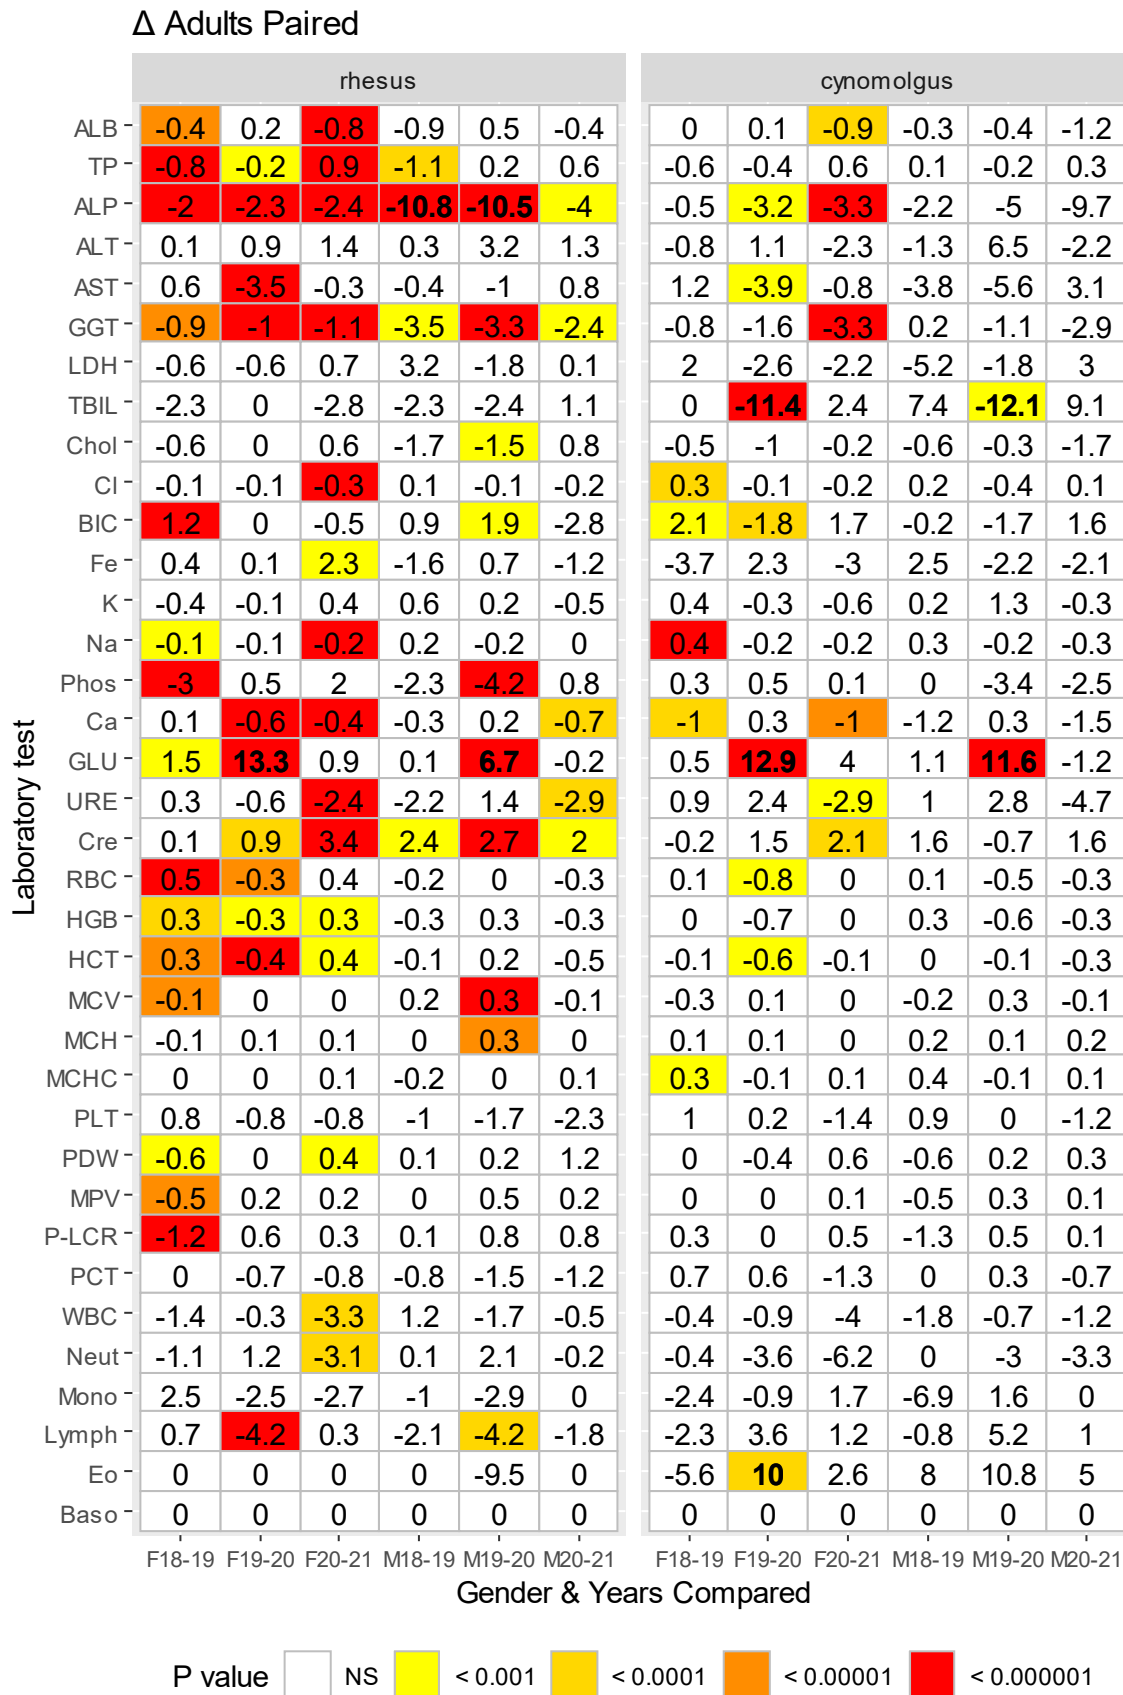

Figure S1 A. Paired comparisons between years in adult rhesus and cynomolgus macaques, numbers indicate percentual differences (Delta) between Year2 – Year1.

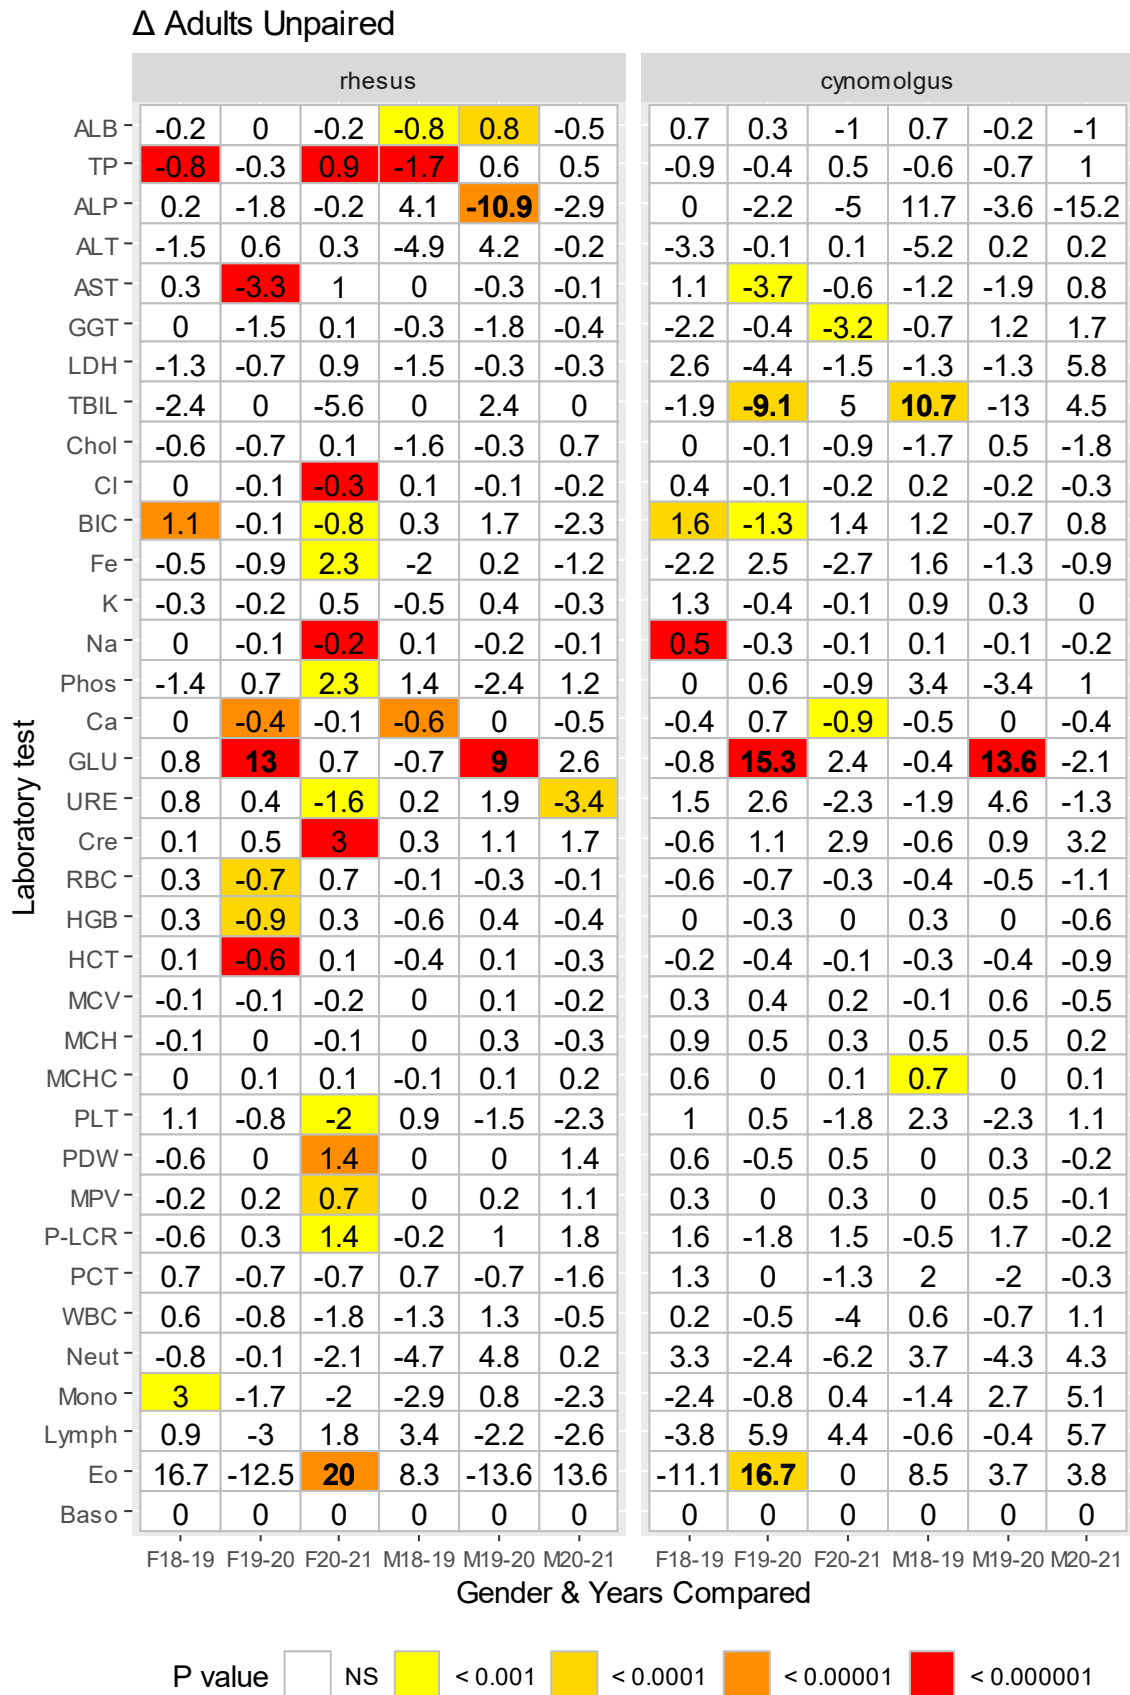

Figure S1 B. Unpaired comparisons between years in adult rhesus and cynomolgus macaques, numbers indicate percentual differences (Delta) between Year2 – Year1.

# Δ Juveniles Unpaired

| Laboratory test | rhesus |        |        |        |        |        | cynomolgus |        |        |        |        |        |
|-----------------|--------|--------|--------|--------|--------|--------|------------|--------|--------|--------|--------|--------|
|                 | F18-19 | F19-20 | F20-21 | M18-19 | M19-20 | M20-21 | F18-19     | F19-20 | F20-21 | M18-19 | M19-20 | M20-21 |
| ALB             | -0.4   | 0.4    | -0.6   | -0.5   | 1      | -0.5   | 0.6        | 0.3    | -1.8   | -0.5   | 0.6    | -1.1   |
| TP              | -0.4   | -0.2   | 0.9    | -0.7   | 0.3    | 0.4    | -1.1       | -0.4   | 0.2    | -1.2   | -0.5   | 0.4    |
| ALP             | -1.3   | -3.7   | -1.1   | 1.1    | -1.5   | -1.3   | 6.3        | -1.1   | -3.6   | 1.3    | 0.1    | 0.5    |
| ALT             | -0.5   | -2.2   | 1.8    | -0.6   | -1.6   | -0.7   | 3.6        | 0.4    | -1.3   | 1      | -0.2   | -0.4   |
| AST             | 0.5    | -4     | 1.5    | 0.7    | -4.2   | -0.5   | 2.4        | -7.3   | 1.4    | 0.2    | -7.8   | 1.6    |
| GGT             | -1.5   | -3     | 1.2    | 1.6    | -0.2   | -0.8   | 4          | -4.3   | -5.1   | 2      | 0.3    | -0.8   |
| LDH             | -0.7   | -2.3   | 1      | -3.7   | -3.5   | 4.1    | 2.8        | -7.6   | 0.9    | -2.8   | -1.6   | -1.2   |
| TBIL            | -3.8   | -4.5   | 0      | -1.9   | -4.2   | 0      | -7.7       | -3.7   | 9.6    | -4.5   | -7.7   | 4.2    |
| Chol            | -0.9   | -1.5   | 0.9    | -1.2   | -0.7   | -0.6   | 1.9        | -2.5   | 0.6    | 1.1    | 0.9    | 0.5    |
| Cl              | -0.4   | 0.2    | -0.4   | -0.1   | -0.1   | -0.2   | 0.4        | -0.2   | -0.5   | 0.4    | -0.4   | 0      |
| BIC             | 0.2    | -0.1   | -0.7   | 0.6    | -0.5   | -0.5   | 4          | -2.2   | 2.1    | 1.1    | -1.5   | 2.3    |
| Fe              | 1.8    | -0.5   | -0.3   | -0.8   | 1.6    | -2.6   | -6.2       | 5.5    | -1.1   | -1.4   | 2.8    | -2.9   |
| K               | -0.5   | -0.1   | -0.3   | -0.4   | 0.2    | -0.3   | -0.3       | 0.3    | -0.3   | -0.1   | 0.4    | -0.7   |
| Na              | -0.1   | 0      | -0.3   | -0.1   | 0      | -0.2   | 0.6        | -0.4   | 0      | 0.4    | -0.3   | 0      |
| Phos            | 1      | -0.7   | 2.1    | 1.1    | 0.5    | 2      | 4.7        | 0.5    | -2     | 0.7    | -0.7   | -0.2   |
| Ca              | -0.3   | -0.2   | -0.5   | -0.4   | -0.1   | -0.7   | -0.3       | 0.6    | -1.6   | -0.9   | 0.9    | -1.1   |
| GLU             | -0.4   | 11.3   | 2.5    | 1.3    | 9.2    | 0.4    | -1.5       | 16.6   | -2.3   | 1.8    | 15.4   | -2.6   |
| URE             | 2.5    | -1.3   | -3.5   | 1.7    | -2     | -0.5   | 3.6        | 1.2    | -1.7   | 2      | 3      | -1     |
| Cre             | 1.6    | 1.2    | 1.5    | 2.1    | 2.5    | 1      | -0.9       | 1.6    | 0.6    | -0.7   | 1      | 0.2    |
| RBC             | 0.1    | -0.8   | -0.1   | 0.2    | -0.3   | -0.5   | 1          | -0.9   | -0.3   | -0.2   | 0.2    | -0.6   |
| HGB             | 0      | -0.3   | -0.3   | 0.3    | -0.3   | -0.6   | 0.6        | -0.3   | -0.3   | 0      | 0      | -0.3   |
| HCT             | 0.1    | -0.5   | -0.4   | 0.2    | -0.1   | -0.8   | 0.4        | -0.6   | -0.1   | -0.5   | 0.4    | -0.1   |
| MCV             | 0.1    | -0.1   | -0.1   | -0.1   | 0      | -0.4   | -0.4       | 0.4    | 0      | -0.1   | 0.4    | 0.4    |
| MCH             | 0.1    | 0.1    | 0.1    | -0.1   | 0      | 0.1    | -0.1       | 0.2    | 0      | 0.1    | 0.1    | 0.4    |
| MCHC            | -0.1   | 0.1    | 0.2    | 0      | 0      | 0.3    | 0          | -0.1   | -0.1   | 0.2    | -0.1   | 0.1    |
| PLT             | 0.9    | -0.1   | -1.1   | 0.3    | 0.4    | -0.7   | 0.8        | -0.8   | -0.7   | -0.1   | -1     | 0.5    |
| PDW             | -1.2   | 0.4    | 1.7    | -0.1   | -0.1   | 1.4    | 0.2        | -0.9   | 0.8    | -1.2   | 0.2    | -0.2   |
| MPV             | -0.4   | 0.4    | 0.6    | 0.1    | -0.1   | 0.8    | -0.1       | -0.2   | -0.2   | -0.7   | -0.2   | 0.2    |
| P-LCR           | -1.4   | 1      | 1.5    | -0.2   | -0.1   | 1.6    | -0.2       | -1.2   | 0.2    | -1.4   | -0.7   | 0.3    |
| PCT             | 0      | 0.6    | 0      | 0      | 0      | -0.7   | 0          | -1.2   | 1.2    | -1.9   | -0.7   | 0.7    |
| WBC             | 0.4    | 1.1    | -3.1   | 0.5    | -0.6   | 1.6    | -0.4       | -0.2   | -0.6   | -0.5   | -1.7   | 0.8    |
| Neut            | -0.7   | 4      | -7.3   | -0.6   | 3.3    | 0.1    | -0.1       | -5.8   | -5.4   | 3.1    | -8.2   | 2.4    |
| Mono            | 5.8    | -0.4   | -3.7   | 3.2    | -2.3   | 1.8    | -2.1       | -0.2   | 5.8    | -3.3   | 1.6    | 3.3    |
| Lymph           | 4.1    | -2.7   | 1.5    | 1      | -3.2   | 0.9    | -3.1       | 10.2   | 4.3    | -2.3   | 8.4    | -0.8   |
| Eo              | 16.7   | 2.9    | 7.1    | 2      | 5.2    | 7.9    | -18.8      | 23.7   | 6.2    | -16.7  | 14.3   | 7.1    |
| Baso            | 0      | 0      | 0      | 0      | 0      | 16.7   | -16.7      | 16.7   | 0      | 0      | 0      | 0      |

P value   NS   < 0.001   < 0.0001   < 0.00001   < 0.000001

Figure S1 C. Unpaired comparisons between years in juvenile rhesus and cynomolgus macaques, numbers indicate percentual differences (Delta) between Year2 – Year1.

# $\Delta$ between 18-19 and 20-21

| Laboratory test | rhesus |       |       |       | cynomolgus |       |       |       |
|-----------------|--------|-------|-------|-------|------------|-------|-------|-------|
|                 | F < 4  | F ≥ 4 | M < 4 | M ≥ 4 | F < 4      | F ≥ 4 | M < 4 | M ≥ 4 |
| ALB             | -0.3   | -0.2  | 0.4   | 0.3   | -0.5       | 0.2   | -0.2  | -0.5  |
| TP              | -0.2   | -0.2  | 0.1   | 0     | -0.9       | -0.4  | -0.8  | -0.4  |
| ALP             | -5.2   | -1.8  | -1.5  | -9.2  | -0.3       | -4.3  | 1.2   | -3.2  |
| ALT             | -1.1   | -0.1  | -2    | 2.3   | 0.4        | -2.3  | -0.3  | -1.8  |
| AST             | -2.7   | -2.8  | -3.9  | -0.3  | -6.2       | -3.6  | -6.4  | -1.8  |
| GGT             | -3.4   | -1.4  | 0.3   | -2    | -3.4       | -3.7  | 0.5   | 1     |
| LDH             | -2     | -0.9  | -4.8  | -1.7  | -5.1       | -3.1  | -3.5  | 1     |
| TBIL            | -6.5   | -2.6  | -6    | 2.4   | -2         | -6.5  | -7.1  | -7.7  |
| Chol            | -1.6   | -1.1  | -1.5  | -0.7  | -1.8       | -0.5  | 1.7   | -0.3  |
| Cl              | -0.2   | -0.2  | -0.2  | -0.1  | -0.3       | 0     | -0.2  | -0.3  |
| BIC             | -0.3   | 0.1   | -0.6  | 0.2   | 1.1        | 0     | -0.3  | -0.2  |
| Fe              | 0.8    | 0.3   | 0.4   | -1.1  | 1          | 0.3   | 0.7   | -1.6  |
| K               | -0.4   | -0.1  | -0.3  | 0     | 0          | 0.1   | 0     | 0.5   |
| Na              | -0.1   | -0.2  | -0.1  | -0.2  | -0.2       | -0.1  | -0.2  | -0.2  |
| Phos            | 0.9    | 1.4   | 1.6   | -1.6  | 2.3        | 0.5   | -0.4  | -1.2  |
| Ca              | -0.5   | -0.4  | -0.4  | -0.5  | -0.6       | -0.3  | -0.3  | -0.3  |
| GLU             | 12.2   | 13.6  | 10.2  | 10.2  | 14.9       | 15.8  | 15.8  | 12.1  |
| URE             | -1.7   | 0.3   | -1.1  | 0.8   | 2.1        | 1.9   | 3.1   | 2.6   |
| Cre             | 2.9    | 2.1   | 4.3   | 1.9   | 1.7        | 1.8   | 0.6   | 2.1   |
| RBC             | -0.8   | -0.3  | -0.4  | -0.3  | -0.7       | -1.1  | -0.2  | -1.1  |
| HGB             | -0.6   | -0.3  | -0.3  | 0     | 0          | -0.3  | 0     | -0.3  |
| HCT             | -0.6   | -0.5  | -0.5  | -0.1  | -0.5       | -0.6  | 0.1   | -0.9  |
| MCV             | -0.1   | -0.2  | -0.2  | 0     | 0.3        | 0.6   | 0.4   | 0.5   |
| MCH             | 0.1    | -0.1  | 0     | 0.2   | 0.1        | 0.9   | 0.5   | 0.8   |
| MCHC            | 0.2    | 0.1   | 0.1   | 0.2   | -0.1       | 0.5   | 0.1   | 0.3   |
| PLT             | -0.2   | -1.1  | 0.2   | -1.7  | -1.2       | 0     | -0.8  | -1.4  |
| PDW             | 0.2    | 0.4   | 0.2   | 0.4   | -0.4       | 0     | -0.6  | 0.2   |
| MPV             | 0.3    | 0.2   | 0.5   | 0.6   | -0.2       | 0.2   | -0.5  | 0.3   |
| P-LCR           | 0.4    | 0.6   | 0.6   | 2     | -1.2       | 0.1   | -0.8  | 1.4   |
| PCT             | 0.6    | -0.7  | 0     | -1.5  | -0.6       | 0     | -1.4  | -1.4  |
| WBC             | 0.1    | -1.1  | 0.1   | 0.6   | -0.7       | -1.6  | -1.6  | 0     |
| Neut            | -0.1   | -1.7  | 3.1   | 2.2   | -7.6       | -4    | -5.2  | -1.1  |
| Mono            | 1.6    | -1.3  | 1.4   | -2    | 2.5        | -2.6  | 1     | 3.4   |
| Lymph           | 0.1    | -1.8  | -2.3  | -1.8  | 12.2       | 6.3   | 6.4   | 3.4   |
| Eo              | 12.5   | 5.6   | 10    | 0     | 25         | 10.9  | 8.8   | 10.6  |
| Baso            | 0      | 0     | 0     | 0     | 0          | 0     | 0     | 0     |

P value  NS  < 0.001  < 0.0001  < 0.00001  < 0.000001

Figure S1 D. Unpaired comparisons between years in rhesus and cynomolgus macaques, numbers indicate percentual differences (Delta) between 20-21 – 18-19.
