# Supplementary material for: Reference Intervals and Percentiles for Hematologic and Serum Biochemical Values in Captive Bred Rhesus (Macaca mulatta) and Cynomolgus Macaques (Macaca fascicularis)
Source: MDPI journal article supplement (doi:10.3390/ani13030445), 2023-01-28
Supplement: s1 [file s1]

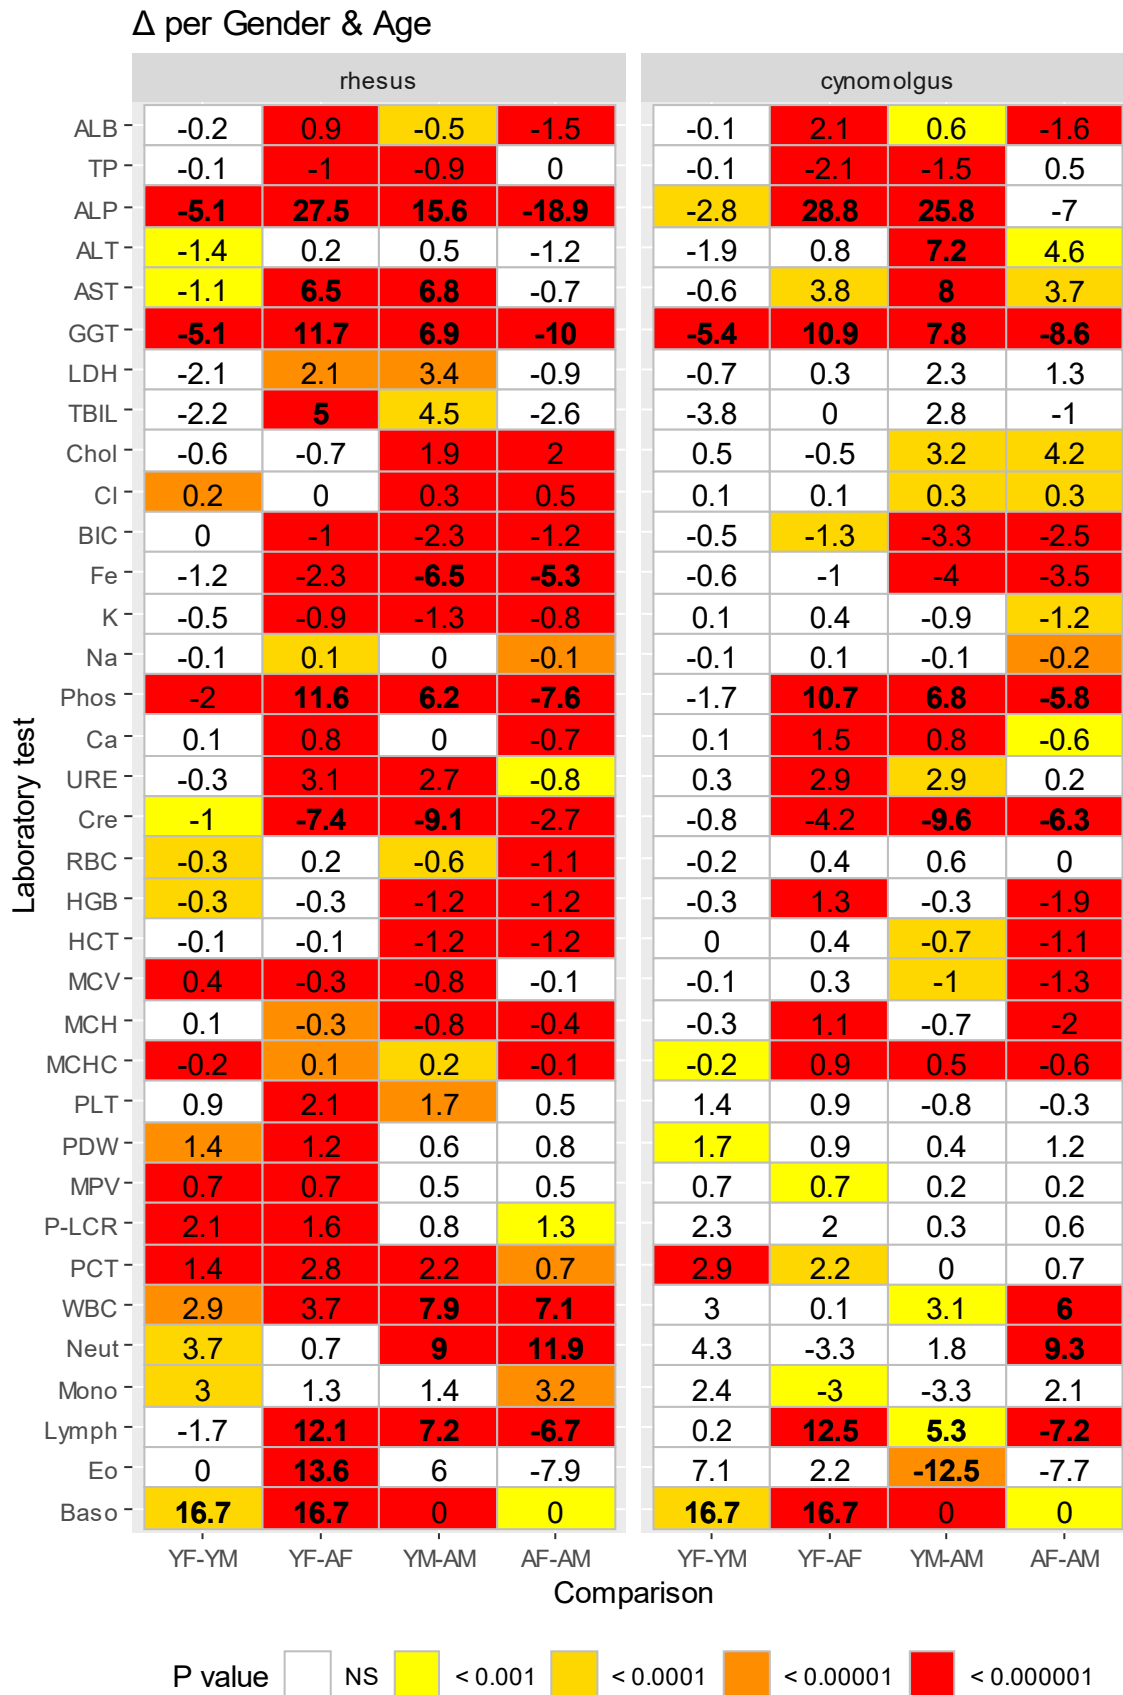

Figure S3A. Comparisons between gender and age in rhesus and cynomolgus macaques, numbers indicate percentual differences (Delta) between, Delta values greater than 5% are in bold. YF-YM = Young Females and Males, YF-AF = Young and Adult Females, YM-AM = Young and Adult Males, AF-AM = Adult Females and Males.

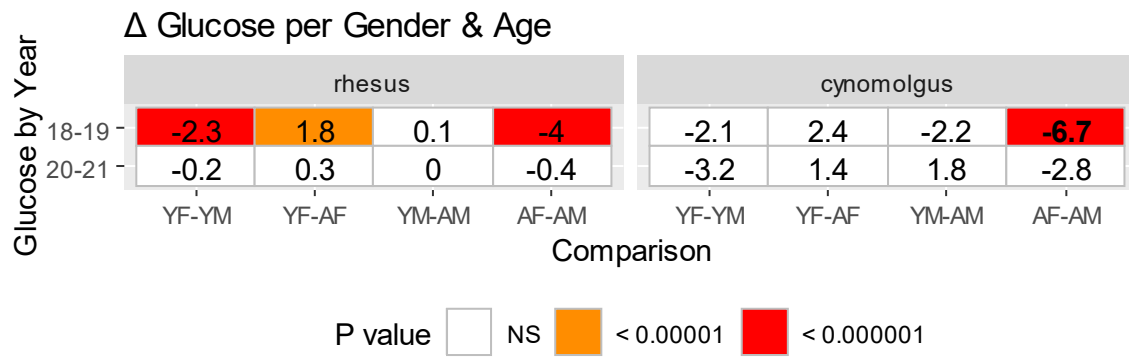

Figure S3B. Glucose comparison between 2018-2019 and 2020-201, gender and age in rhesus and cynomolgus macaques, numbers indicate percentual differences (Delta) between, Delta values greater than 5% are in bold. YF-YM = Young Females and Males, YF-AF = Young and Adult Females, YM-AM = Young and Adult Males, AF-AM = Adult Females and Males.
