# Supplementary material for: Reference Intervals and Percentiles for Hematologic and Serum Biochemical Values in Captive Bred Rhesus (Macaca mulatta) and Cynomolgus Macaques (Macaca fascicularis)
Source: MDPI journal article supplement (doi:10.3390/ani13030445), 2023-01-28
Supplement: s1 [file s1]

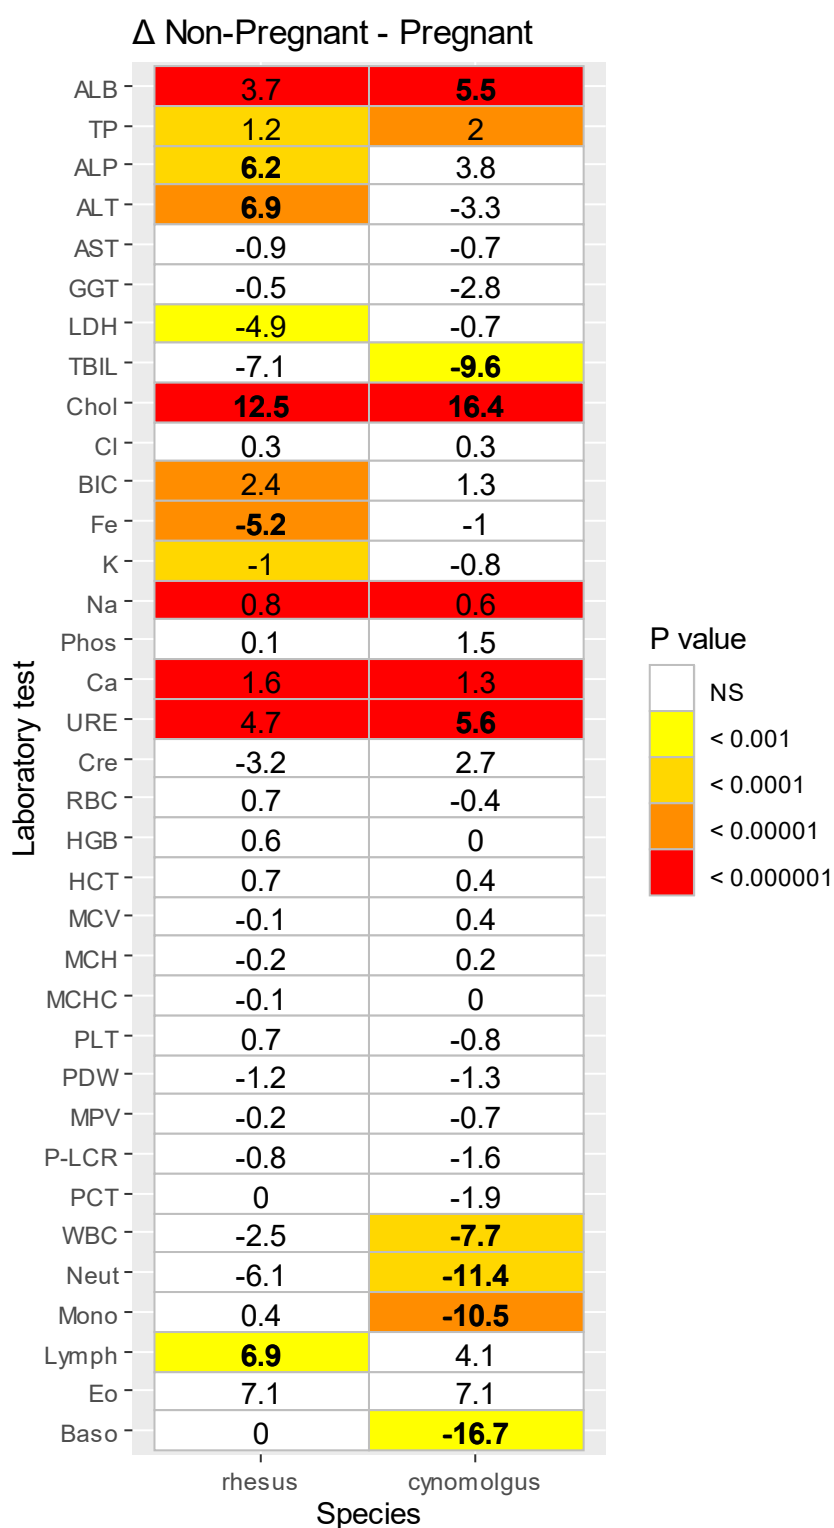

Figure S7A. Comparisons between non-pregnant and pregnant adult rhesus and cynomolgus females, numbers indicate percentual differences (Delta) between Normal – Pregnant, Delta values greater than 5% are in bold.

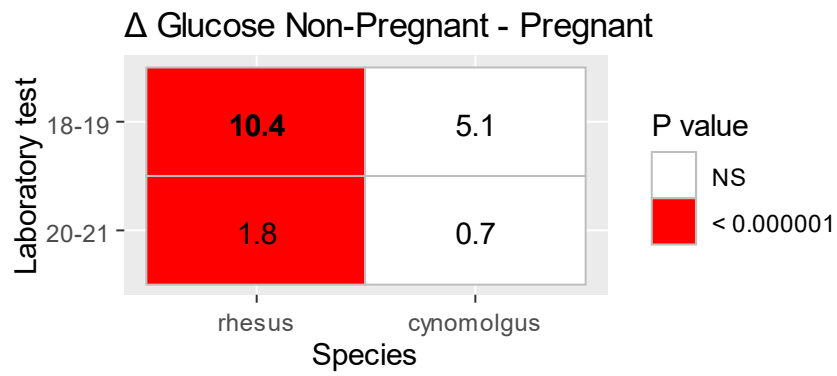

Figure S7B. Glucose comparison between 2018-2019 and 2020-201 for non-pregnant and pregnant adult rhesus and cynomolgus females, numbers indicate percentual differences (Delta) between Normal – Pregnant, Delta values greater than 5% are in bold.
